# Supplementary material
Source: Springer Nature journal article supplement (https://www.springermedizin.de/resource/supplementary/13049_2009_165_MOESM3_ESM.pdf/9666012)

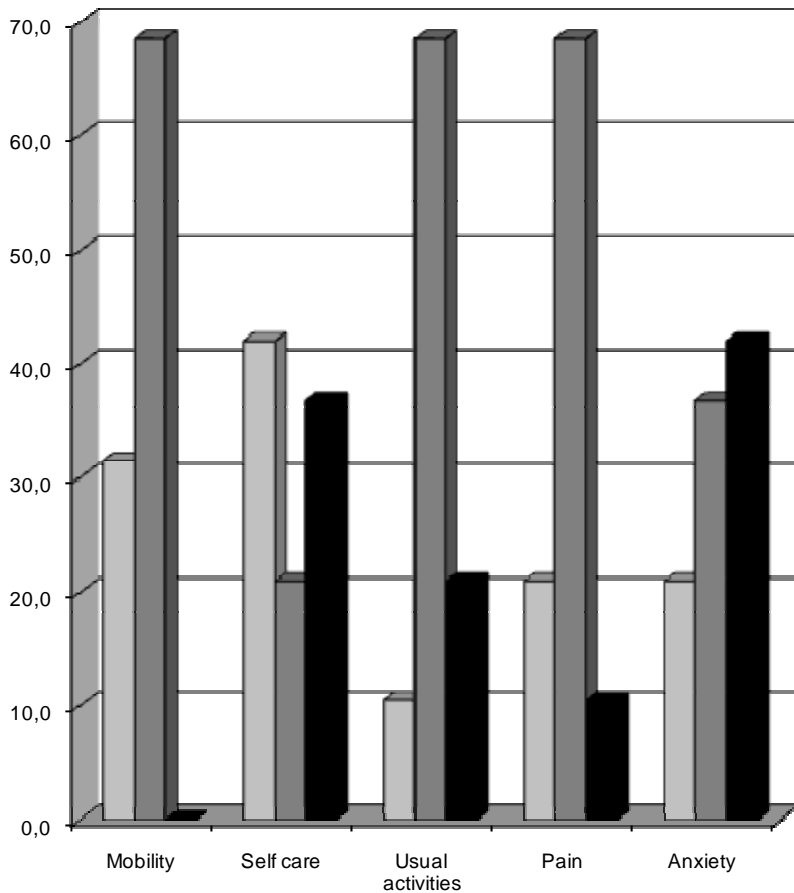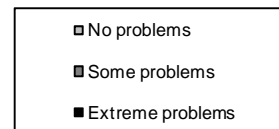

Supplement: MOESM3 [file 9666012]
